# Supplementary material for: Flavour identification in frontotemporal lobar degeneration
Source: PubMed Central journal article supplement — J Neurol Neurosurg Psychiatry. 2012 Nov 8;84(1):88–93. doi: 10.1136/jnnp-2012-303853 (PMC3534254; doi:10.1136/jnnp-2012-303853), 2012-11-08
Supplement: jnnp-2012-303853-s1.pdf [file jnnp-2012-303853-s1.pdf]

**SUPPLEMENTARY MATERIAL****Flavour identification in frontotemporal lobar degeneration**

Rohani Omar, Colin J. Mahoney, Aisling H. Buckley, Jason D. Warren

**Table S1.** Stimuli used in the experimental assessment of flavour identification

| <b>TRIAL</b> | <b>TARGET</b> | <b>RELATED FOIL</b> | <b>DISTANT FOIL</b> | <b>TARGET<br/>FRUIT / NONFRUIT</b> |
|--------------|---------------|---------------------|---------------------|------------------------------------|
| 1            | Strawberry    | Blackberry          | Popcorn             | F                                  |
| 2            | Vanilla       | Licorice            | Strawberry          | NF                                 |
| 3            | Cherry        | Raspberry           | Cinnamon            | F                                  |
| 4            | Blackberry    | Strawberry          | Peanut              | F                                  |
| 5            | Coffee        | Chocolate           | Lemon               | NF                                 |
| 6            | Banana        | Pear                | Coffee              | F                                  |
| 7            | Chocolate     | Peanut              | Orange              | NF                                 |
| 8            | Pear          | Banana              | Peanut              | F                                  |
| 9            | Raspberry     | Cherry              | Caramel             | F                                  |
| 10           | Cinnamon      | Licorice            | Pear                | NF                                 |
| 11           | Lemon         | Orange              | Peanut              | F                                  |
| 12           | Licorice      | Cinnamon            | Banana              | NF                                 |
| 13           | Orange        | Lemon               | Popcorn             | F                                  |
| 14           | Peanut        | Chocolate           | Cherry              | NF                                 |
| 15           | Popcorn       | Vanilla             | Lemon               | NF                                 |
| 16           | Caramel       | Chocolate           | Blackberry          | NF                                 |
| 17           | Ginger Ale    | Licorice            | Banana              | NF                                 |
| 18           | Pineapple     | Orange              | Chocolate           | F                                  |
| 19           | Blueberry     | Cherry              | Ginger Ale          | F                                  |
| 20           | Bubblegum     | Caramel             | Pear                | NF                                 |
